# Supplementary material
Source: Research Square preprint supplement (doi:10.21203/rs.3.rs-8979692/v1)
Supplement: Supplementary file 1 [file dba2e8be25a6404f1888a3c8.pdf]

Environmental factors influencing downstream  
migration of European eel (*Anguilla anguilla* L.)  
in a free-flowing river system

Hanna Jaspaert<sup>1,2\*</sup>, Pieterjan Verhelst<sup>2</sup> and Jan M. Baetens<sup>1</sup>

<sup>1</sup>Bionamix Research Group, Faculty of Bioscience Engineering, Ghent  
University, Coupure Links 653, Ghent, 9000, Belgium.

<sup>2</sup>Research Institute for Nature and Forest (INBO), Havenlaan 88,  
Brussel, 1000, Belgium.

\*Corresponding author(s). E-mail(s): [hanna.jaspaert@ugent.be](mailto:hanna.jaspaert@ugent.be);  
Contributing authors: [pieterjan.verhelst@inbo.be](mailto:pieterjan.verhelst@inbo.be); [jan.baetens@ugent.be](mailto:jan.baetens@ugent.be);

Supplemental information containing tables S1-S3.

**Table S1** Overview of the characteristics of the capture and release of eels tagged in this study.

| tag serial number | Capture date and time | Capture latitude | Capture longitude | Release date and time | Release latitude | Release longitude |
|-------------------|-----------------------|------------------|-------------------|-----------------------|------------------|-------------------|
| 1171748           | 02/10/2019 08:00      | 51.149272        | 51.149272         | 02/10/2019 13:00      | 51.144779        | 5.003906          |
| 1171749           | 02/10/2019 08:00      | 51.149272        | 51.149272         | 02/10/2019 13:00      | 51.144779        | 5.003906          |
| 1171750           | 02/10/2019 08:00      | 51.149272        | 51.149272         | 02/10/2019 13:00      | 51.144779        | 5.003906          |
| 1171751           | 02/10/2019 08:00      | 51.149272        | 51.149272         | 02/10/2019 13:00      | 51.144779        | 5.003906          |
| 1305787           | 02/10/2019 08:00      | 51.144938        | 51.144938         | 02/10/2019 13:00      | 51.144779        | 5.003906          |
| 1305788           | 02/10/2019 08:00      | 51.144938        | 51.144938         | 02/10/2019 13:00      | 51.144779        | 5.003906          |
| 1305789           | 02/10/2019 08:00      | 51.144938        | 51.144938         | 02/10/2019 13:00      | 51.144779        | 5.003906          |
| 1305790           | 02/10/2019 08:00      | 51.144938        | 51.144938         | 02/10/2019 13:00      | 51.144779        | 5.003906          |
| 1305791           | 02/10/2019 08:00      | 51.144938        | 51.144938         | 02/10/2019 13:00      | 51.144779        | 5.003906          |
| 1305792           | 02/10/2019 08:00      | 51.136875        | 51.136875         | 02/10/2019 13:00      | 51.144779        | 5.003906          |
| 1305793           | 02/10/2019 08:00      | 51.136875        | 51.136875         | 02/10/2019 13:00      | 51.144779        | 5.003906          |
| 1294154           | 02/10/2019 08:00      | 51.149272        | 51.149272         | 02/10/2019 13:00      | 51.144779        | 5.003906          |
| 1294155           | 02/10/2019 08:00      | 51.149272        | 51.149272         | 02/10/2019 13:00      | 51.144779        | 5.003906          |
| 1294156           | 02/10/2019 08:00      | 51.149272        | 51.149272         | 02/10/2019 13:00      | 51.144779        | 5.003906          |
| 1294157           | 02/10/2019 08:00      | 51.144938        | 51.144938         | 02/10/2019 13:00      | 51.144779        | 5.003906          |
| 1294158           | 02/10/2019 08:00      | 51.144938        | 51.144938         | 02/10/2019 13:00      | 51.144779        | 5.003906          |
| 1294159           | 02/10/2019 08:00      | 51.144938        | 51.144938         | 02/10/2019 13:00      | 51.144779        | 5.003906          |
| 1305786           | 03/10/2019 08:00      | 51.144938        | 51.144938         | 03/10/2019 12:00      | 51.144779        | 5.003906          |
| 1294160           | 03/10/2019 08:00      | 51.149272        | 51.149272         | 03/10/2019 12:00      | 51.144779        | 5.003906          |
| 1294161           | 03/10/2019 08:00      | 51.144938        | 51.144938         | 03/10/2019 12:00      | 51.144779        | 5.003906          |
| 1305785           | 08/10/2019 08:00      | 51.149272        | 51.149272         | 08/10/2019 09:00      | 51.144779        | 5.003906          |
| 1171746           | 09/10/2019 14:30      | 51.136875        | 51.136875         | 09/10/2019 17:30      | 51.144779        | 5.003906          |
| 1171747           | 09/10/2019 14:30      | 51.136875        | 51.136875         | 09/10/2019 17:30      | 51.144779        | 5.003906          |
| 1171753           | 09/10/2019 14:30      | 51.136875        | 51.136875         | 09/10/2019 17:30      | 51.144779        | 5.003906          |
| 1305784           | 10/10/2019 09:30      | 51.136875        | 51.136875         | 10/10/2019 11:30      | 51.144779        | 5.003906          |
| 1294162           | 10/10/2019 09:30      | 51.136875        | 51.136875         | 10/10/2019 11:30      | 51.144779        | 5.003906          |
| 1294164           | 08/10/2020 10:30      | 51.144779        | 51.144779         | 08/10/2020 11:00      | 51.144779        | 5.003906          |
| 1294168           | 09/10/2020 09:45      | 51.144779        | 51.144779         | 09/10/2020 10:15      | 51.144779        | 5.003906          |
| 1294172           | 14/10/2020 09:45      | 51.147663        | 51.147663         | 14/10/2020 10:30      | 51.139997        | 4.997392          |
| 1294171           | 14/10/2020 09:55      | 51.144938        | 51.144938         | 14/10/2020 10:30      | 51.139997        | 4.997392          |
| 1294166           | 09/12/2020 10:45      | 51.138881        | 51.138881         | 09/12/2020 11:10      | 51.138881        | 4.996931          |
| 1294169           | 16/12/2020 10:00      | 51.14942         | 51.14942          | 16/12/2020 12:30      | 51.144779        | 5.003906          |
| 1294170           | 16/12/2020 10:00      | 51.14942         | 51.14942          | 16/12/2020 12:30      | 51.144779        | 5.003906          |
| 1294167           | 16/12/2020 10:00      | 51.14942         | 51.14942          | 16/12/2020 12:30      | 51.144779        | 5.003906          |
| 1294165           | 16/12/2020 10:00      | 51.144938        | 51.144938         | 16/12/2020 12:30      | 51.144779        | 5.003906          |
| 1294189           | 16/12/2020 10:00      | 51.144938        | 51.144938         | 16/12/2020 12:30      | 51.144779        | 5.003906          |
| 1294190           | 16/12/2020 10:00      | 51.144938        | 51.144938         | 16/12/2020 12:30      | 51.144779        | 5.003906          |
| 1294191           | 18/12/2020 08:00      | 51.144938        | 51.144938         | 18/12/2020 10:35      | 51.144779        | 5.003906          |
| 1293822           | 18/12/2020 08:00      | 51.14942         | 51.14942          | 18/12/2020 10:35      | 51.144779        | 5.003906          |

**Table S2** Overview of the characteristics of the eels tagged in this study.

| tag serial number | total length<br>(mm) | vertical eye diameter<br>(mm) | horizontal eye diameter<br>(mm) | pectoral fin length<br>(mm) | weight<br>(g) | sex    | Durif stage |
|-------------------|----------------------|-------------------------------|---------------------------------|-----------------------------|---------------|--------|-------------|
| 1171748           | 658                  | 9.8                           | 10.24                           | 34.42                       | 571           | female | FV          |
| 1171749           | 655                  | 8.44                          | 9.82                            | 35.94                       | 513           | female | FV          |
| 1171750           | 686                  | 9.22                          | 9.68                            | 34.4                        | 565           | female | FV          |
| 1171751           | 770                  | 7.28                          | 7.76                            | 32.56                       | 825           | female | FIII        |
| 1305787           | 555                  | 7.76                          | 8.46                            | 29.24                       | 362           | female | FV          |
| 1305788           | 423                  | 6.52                          | 6.54                            | 20.72                       | 141           | male   | MII         |
| 1305789           | 578                  | 7.58                          | 8.5                             | 29.3                        | 335           | female | FV          |
| 1305790           | 554                  | 7.52                          | 7.88                            | 22.1                        | 317           | female | FIII        |
| 1305791           | 559                  | 6.76                          | 7.66                            | 22.72                       | 317           | female | FIII        |
| 1305792           | 628                  | 6.7                           | 7.72                            | 27.16                       | 388           | female | FIII        |
| 1305793           | 544                  | 8.2                           | 9.5                             | 29.32                       | 283           | female | FV          |
| 1294154           | 727                  | 9.3                           | 10.5                            | 30.78                       | 722           | female | FIII        |
| 1294155           | 798                  | 9.14                          | 11.28                           | 37.28                       | 855           | female | FV          |
| 1294156           | 716                  | 9.2                           | 9.62                            | 31.72                       | 685           | female | FIII        |
| 1294157           | 773                  | 10                            | 10.84                           | 32.18                       | 949           | female | FIV         |
| 1294158           | 669                  | 8.94                          | 9.8                             | 31.68                       | 631           | female | FV          |
| 1294159           | 779                  | 9.38                          | 10.1                            | 40.18                       | 872           | female | FV          |
| 1305786           | 629                  | 8.7                           | 8.73                            | 28.92                       | 407           | female | FV          |
| 1294160           | 778                  | 10.67                         | 11.55                           | 44                          | 834           | female | FV          |
| 1294161           | 679                  | 9.13                          | 9.26                            | 36.61                       | 730           | female | FV          |
| 1305785           | 660                  | 8.46                          | 9.58                            | 35                          | 385           | female | FV          |
| 1171746           | 691                  | 8.69                          | 9.59                            | 34.69                       | 571           | female | FV          |
| 1171747           | 641                  | 6.61                          | 7.08                            | 30.33                       | 459           | female | FIII        |
| 1171753           | 635                  | 9.19                          | 9.77                            | 35.63                       | 462           | female | FV          |
| 1305784           | 555                  | 8.9                           | 8.84                            | 33.2                        | 276           | female | FV          |
| 1294162           | 786                  | 11.35                         | 12.54                           | 41.98                       | 874           | female | FV          |
| 1294164           | 781                  | 10.61                         | 11.28                           | 40.05                       | 756           | female | FV          |
| 1294168           | 736                  | 7.05                          | 7.8                             | 37.75                       | 705.6         | female | FIII        |
| 1294172           | 666                  | 7.63                          | 8                               | 29.75                       | 502.2         | female | FIII        |
| 1294171           | 647                  | 8.56                          | 9.08                            | 32.55                       | 464           | female | FV          |
| 1294166           | 660                  | 9.15                          | 9.17                            | 33.24                       | 585.6         | female | FV          |
| 1294169           | 780                  | 7.7                           | 7.89                            | 37.76                       | 825.1         | female | FIII        |
| 1294170           | 688                  | 10.1                          | 10.04                           | 37.57                       | 637.2         | female | FV          |
| 1294167           | 795                  | 10.63                         | 11.89                           | 43.77                       | 1074.5        | female | FIV         |
| 1294165           | 688                  | 9.12                          | 10                              | 30.16                       | 557           | female | FV          |
| 1294189           | 642                  | 8.9                           | 8.95                            | 33.29                       | 524           | female | FV          |
| 1294190           | 649                  | 10.06                         | 10.71                           | 33.59                       | 509.1         | female | FV          |
| 1294191           | 686                  | 7.27                          | 7.68                            | 28.41                       | 514.6         | female | FIII        |
| 1293822           | 705                  | 9.66                          | 9.69                            | 32.72                       | 609.3         | female | FV          |

**Table S3** Overview of the models and specifications of the transmitters used in this study.

| Brand     | Model    | Battery life (days) | Size dimensions<br>(length x diameter; mm) | Weight (g) |
|-----------|----------|---------------------|--------------------------------------------|------------|
| Innovasea | V13-1L   | 507 - 1582          | 36 x 13                                    | 11         |
| Innovasea | V13P-1X  | 301                 | 24 x 13                                    | 11.3       |
| Innovasea | V13AP-1X | 183                 | 39 x 13                                    | 10.7       |
